# Supplementary material for: Mesoamerican Cypripedium: Mycorrhizal Contributions to Promote Their Conservation as Critically Endangered Species
Source: MDPI journal article supplement (doi:10.3390/plants11121554), 2022-06-12
Supplement: s1 [file s1]

**Table S1.** Habitat characteristics of *Cypripedium* spp. remnant populations used for projection of niche ecological model.

| Species                           | Vegetation | Precipitation (mm) | Soil Type | Clime Code  | Clime Type | Altitude (mosl) |
|-----------------------------------|------------|--------------------|-----------|-------------|------------|-----------------|
| <i>Cypripedium dickinsonianum</i> | CF         | 1200–1500          | Lithosol  | (A)C(m)     | TH         | 1517            |
|                                   | OPF        | 1500–2000          | Luvisol   | C(m)(w)     | TH         | 1400            |
|                                   | OPF        | 800–1200           | Luvisol   | (A)C(w1)(w) | TSH        | 1527            |
| <i>Cypripedium irapeanum</i>      | OPF        | 1200–1500          | Luvisol   | C(w2)(w)    | TSH        | 1797            |
|                                   | OPF        | 1200–1500          | Luvisol   | C(w2)(w)    | TSH        | 1782            |
|                                   | OPF        | 1200–1500          | Luvisol   | C(w2)(w)    | TSH        | 2196            |
|                                   | OPF        | 1200–1500          | Regosol   | A(C)m(w)    | TH         | 1574            |
|                                   | OPF        | 1500–2000          | Andisol   | (A)C(m)(w)  | TH         | 1702            |
|                                   | TDF        | 1200–1500          | Rendzina  | A(C)w1(w)   | TSH        | 1822            |
|                                   | OPF        | 600–800            |           | C(w2)(w)    | TSH        | 2570            |
|                                   | TDF        | 800–1200           | Vertisol  | C(w0)(w)    | TSH        | 2047            |
|                                   | OPF        | 1200–1500          | Luvisol   | C(w2)(w)    | TSH        | 1606            |
|                                   | OPF        | 1200–1500          | Luvisol   | C(w2)(w)    | TSH        | 1867            |
|                                   | OPF        | 1200–1500          | Luvisol   | C(w2)(w)    | TSH        | 2033            |
|                                   | OPF        | 1500–2000          | Luvisol   | (A)C(m)     | TH         | 1409            |
|                                   | OPF        | 1200–1500          | Andisol   | C(w2)(w)    | TSH        | 2158            |
|                                   | OPF        | 800–1200           | Lithosol  | (A)C(w2)(w) | TSH        | 1574            |
|                                   | OPF        | 1500–2000          | Cambisol  | Aw2         | WS         | 885             |
|                                   | OPF        | 1200–1500          | Lithosol  | (A)C(w2)(w) | TSH        | 1574            |
|                                   | OPF        | 1200–1500          | Andisol   | C(w2)(w)    | TSH        | 2074            |
|                                   | TDF        | 800–1200           | Regosol   | Aw0         | WS         | 921             |
|                                   | OPF        | 1500–2000          | Cambisol  | (A)C(w2)(w) | TSH        | 1692            |
|                                   | OPF        | 1200–1500          | Andisol   | A(C)w2(w)   | TSH        | 1744            |
|                                   | OPF        | 1200–1500          | Andisol   | A(C)w2(w)   | TSH        | 1812            |
|                                   | OPF        | 800–1200           | Cambisol  | A(C)w2(w)   | TSH        | 1456            |
|                                   | TDF        | 1200–1500          | Feozem    | Aw1(w)      | WS         | 325             |
|                                   | TDF        | 600–800            | Feozem    | (A)C(w0)(w) | TSH        | 1634            |
|                                   | TDF        | 800–1200           | Regosol   | (A)C(w1)(w) | TSH        | 1508            |
|                                   | TDF        | 600–800            | Vertisol  | (A)C(w0)(w) | TSH        | 1584            |
|                                   | TDF        | 800–1200           | Lithosol  | Aw0(w)      | WS         | 881             |
|                                   | OPF        | 600–800            | Luvisol   | C(w2)(w)    | TSH        | 2301            |
|                                   | TDF        | 800–1200           | Acrisol   | Aw0(w)      | WS         | 1247            |
|                                   | TDF        | 600–800            | Vertisol  | C(w0)(w)    | TSH        | 1909            |
|                                   | TDF        | 600–800            | Vertisol  | C(w2)(w)    | TSH        | 1965            |
|                                   | TDF        | 800–1200           | Feozem    | Aw0(w)      | WS         | 1324            |
|                                   | OPF        | 1200–1500          | Acrisol   | (A)C(w2)(w) | TSH        | 1055            |
|                                   | OPF        | 800–1200           | Feozem    | C(w1)(w)    | TSH        | 2099            |
|                                   | TDF        | 800–1200           | Lithosol  | C(w2)       | TSH        | 1226            |
|                                   | CF         | 1200–1500          | Luvisol   | Aw1(w)      | WS         | 609             |
|                                   | CF         | 1500–2000          | Acrisol   | C(m)(w)     | TH         | 1316            |
|                                   | OPF        | 1500–2000          | Feozem    | C(m)        | TH         | 1762            |
|                                   | OPF        | 1500–2000          | Acrisol   | (A)C(m)     | TH         | 1201            |
|                                   | CF         | 1500–2000          | Luvisol   | Aw2(w)      | WS         | 582             |
|                                   | CF         | 1500–2000          | Luvisol   | (A)C(m)     | TH         | 984             |
|                                   | CF         | 1500–2000          | Luvisol   | (A)C(m)     | TH         | 876             |

|                          |     |           |          |             |      |      |
|--------------------------|-----|-----------|----------|-------------|------|------|
|                          | CF  | 1500–2000 | Luvisol  | (A)C(m)     | TH   | 1089 |
|                          | TDF | 600–800   | Cambisol | A(C)w0(w)   | TSH  | 1786 |
|                          | CF  | 1200–1500 | Luvisol  | Aw1(w)      | WS   | 552  |
|                          | CF  | 1200–1500 | Rendzina | (A)C(m)     | TH   | 1026 |
|                          | TDF | 800–1200  | Regosol  | Aw0(w)      | WS   | 680  |
|                          | TDF | 800–1200  | Lithosol | A(C)w1(w)   | TSH  | 1636 |
|                          | OPF | 1200–1500 | Andisol  | A(C)w2(w)   | TSH  | 1744 |
|                          | OPF | 800–1200  | Feozem   | C(w1)(w)    | TSH  | 2061 |
| <i>Cypripedium molle</i> | TDF | 600–800   | Feozem   | BS1hw(w)    | SDSH | 1690 |
|                          | OPF | 800–1200  | Regosol  | C(w0)(w)    | TSH  | 1804 |
|                          | OPF | 2500–4000 | Regosol  | C(w2)(w)    | TSH  | 1785 |
|                          | TDF | 800–1200  | Cambisol | C(w0)(w)    | TSH  | 2081 |
|                          | TDF | 800–1200  | Cambisol | C(w0)(w)    | TSH  | 2217 |
|                          | OPF | 600–800   | Lithosol | C(w1)(w)    | TSH  | 2208 |
|                          | OPF | 600–800   | Rendzina | BS1hw(w)    | SDSH | 1886 |
|                          | TDF | 600–800   | Cambisol | A(C)w0(w)   | TSH  | 1872 |
|                          | OPF | 600–800   | Lithosol | C(w0)(w)    | TSH  | 2213 |
|                          | OPF | 600–800   | Lithosol | C(w0)(w)    | TSH  | 2213 |
|                          | OPF | 1200–1500 | Acrisol  | C(w2)(w)    | TSH  | 2488 |
|                          | TDF | 800–1200  | Lithosol | C(w0)(w)    | TSH  | 2067 |
|                          | OPF | 800–1200  | Acrisol  | C(w1)(w)    | TSH  | 2115 |
|                          | OPF | 800–1200  | Luvisol  | (A)C(w0)(w) | TSH  | 1857 |
|                          | OPF | 800–1200  | Luvisol  | (A)C(w0)(w) | TSH  | 1857 |
|                          | TDF | 600–800   | Regosol  | BS1hw(w)    | SDSH | 1590 |
|                          | TDF | 600–800   | Lithosol | C(w0)(w)    | TSH  | 2018 |
|                          | TDF | 600–800   | Cambisol | A(C)w0(w)   | TSH  | 1859 |
|                          | OPF | 800–1200  | Cambisol | C(w2)(w)    | TSH  | 2013 |
|                          | XS  | 400–600   | Regosol  | BS1kw(w)    | SDT  | 2065 |
|                          | TDF | 600–800   | Cambisol | A(C)w0(w)   | TSH  | 1863 |
|                          | OPF | 400–600   | Lithosol | BS1kw(w)    | SDT  | 2190 |
|                          | OPF | 800–1200  | Regosol  | C(w2)(w)    | TSH  | 2549 |
|                          | TDF | 800–1200  | Regosol  | A(C)w0(w)   | TSH  | 2041 |
|                          | TDF | 600–800   | Regosol  | A(C)w0(w)   | TSH  | 1697 |
|                          | OPF | 600–800   | Lithosol | C(w2)(w)    | TSH  | 2295 |
|                          | XS  | 800–1200  | Regosol  | C(w1)(w)    | TSH  | 2457 |
|                          | TDF | 600–800   | Cambisol | A(C)w0(w)   | TSH  | 1859 |

CD = Cloud forest, OPF = Oak-pine Forest, TDF = Tropical Deciduous Forest, XS = Xerophilous scrub. TH = Tempered humid; TSH= Tempered subhumid, WS = Warm subhumid, SDSH = Semi-dry semi-humid, SDT = Semidry tempered.

**Table S2.** Some studies in *Cypripedium* endophytes using metabarcoding or traditional approaches, entries are ordered in chronological descendent order.

| Reference           | Host orchid                                                                     | Primers                     | Identified order/families                                                                                                                                                            |
|---------------------|---------------------------------------------------------------------------------|-----------------------------|--------------------------------------------------------------------------------------------------------------------------------------------------------------------------------------|
| Chen et al., 2019   | <i>Cypripedium guttatum</i>                                                     | ITS3/ITS4OF                 | Sebacinales<br>Tulasnellaceae<br>Ceratobasidiaceae                                                                                                                                   |
| Farkas-Lasich, 2018 | <i>Cypripedium arietinum</i>                                                    | ITS1F/ITS4                  | <i>Phialocephala fortinii</i><br><i>Leptodontidium orchidicola</i>                                                                                                                   |
| Oja et al., 2015    | <i>Cypripedium calceolus</i><br><i>Neottia ovata</i><br><i>Orchis militaris</i> | ITS1Fngs/ITS4ngs            | Tulasnellaceae-Sebacinales<br>Ceratobasidiaceae<br>Tulasnellaceae<br><i>Russulalaccata</i><br><i>Tulasnellatoma culum</i><br><i>Cadophora finlandica</i><br><i>Cistellaspicicola</i> |
| Bunch et al., 2013  | <i>Cypripedium acaule</i>                                                       | ITS1F–ITS4<br>ITS1OF–ITS4OF | <i>Cladophialophora chaetospora</i><br><i>Diaporthe phaseolorum</i><br><i>Lactarius imperceptus</i><br><i>Meliniomyces variabilis</i><br><i>Oidiodendron maius</i>                   |

|                 |                                 |            |                                                                                                                                                          |
|-----------------|---------------------------------|------------|----------------------------------------------------------------------------------------------------------------------------------------------------------|
|                 |                                 |            | <i>Phialeastrobilina</i><br><i>Phialocephalafortinii</i><br><i>R. virescens</i><br><i>Sorocyberesinae</i><br><i>T. asymmetrica</i><br><i>T. pruinosa</i> |
| Whitridge, 2004 | <i>Cypripedium fasciculatum</i> | ITS1F/ITS4 | <i>Russula</i><br><i>Lactarius</i><br><i>Suillus</i><br><i>Tulasnella</i>                                                                                |
